# Supplementary material for: Antiretroviral Therapy during Long-term Surgical Care: ‘Exploring Difficult Cases in HIV Clinics’ of the Korean Society for AIDS Conference in 2023
Source: PubMed Central journal article supplement — Infect Chemother. 2024 Aug 1;56(3):287–99. doi: 10.3947/ic.2024.0052 (PMC11458491; doi:10.3947/ic.2024.0052), 2024-08-01
Supplement: ic-56-287-s001.pdf [file ic-56-287-s001.pdf]

Review Article

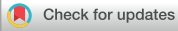

# 장기 수술적 치료 중 항레트로바이러스 요법: 2023년 대한에이즈학회 학술대회 [Exploring Difficult Cases in HIV Clinics]

김정호, 성재은, 안상민, 이용섭, 이정아, 안진영, 정수진, 구남수, 염준섭, 최준용  
연세대학교 의과대학 내과학교실, 에이즈연구소

Open Access

## ABSTRACT

항레트로바이러스 요법 (ART)의 발전으로 HIV 감염인의 평균 수명은 증가하고 있으며, 고령의 HIV 감염인도 증가하고 있다. 이에 따라, 수술을 받거나 혹은 중환자 치료가 필요한 HIV 감염인 역시 증가하고 있다. HIV 감염인의 예후는 ART를 효과적으로 지속하는 것에 달려있기 때문에, 이런 상황의 HIV 감염인에서 효과적으로 ART를 유지하는 것에 대해서는 고찰할 필요가 있다. 본 증례는 ART를 유지하며 잘 조절되고 있던 55세 남성 HIV 감염인이 급성 복통을 주소로 응급실에 내원한 증례이다. 그는 광범위한 장 경색과 범복막염으로 진단받았으며, 중환자실에서 기계 환기와 지속적 신대체 요법 (CRRT)을 포함한 중환자 치료를 받았다. 환자는 비위관을 통해 경장 영양을 공급받았다. 이후 그는 광범위 소장 절제술을 시행 받았으며, 단장증후군 (short bowel syndrome)을 앓게 되었다. 환자는 이 과정에서 ART를 유지하였다. 이런 상황에서 ART를 어떻게 사용하는 것이 좋을지에 대한 문헌 고찰이 본 연구에 포함되었다. 구체적으로, 본 증례에서는 HIV 감염인이 금식하는 경우, 비위관을 가지고 있는 경우, CRRT를 받고 있는 경우, 위장관 수술을 받았을 경우에 ART를 어떻게 사용하는 것이 좋을지에 대한 정보에 대해 기술하였다. 본 증례는 2023년 대한에이즈학회 학술대회 [Exploring Difficult Cases in HIV Clinics] 세션에서 논의되었다.

## 서론

항레트로바이러스 요법 (ART)의 발전으로 HIV 감염인의 평균 수명은 증가하고 있다 [1, 2]. 이에, 비록 신규 감염인은 이전보다 적게 발생하고 있지만, 고령의 HIV 감염인은 증가하고 있다 [3-5]. 이에 따라, HIV 감염인에서 다양한 비감염 합병증 발생 역시 증가하고 있다 [6-9]. 최근에 HIV 진료 현장에서는 HIV 감염인에서의 비감염 합병증에 대한 관리의 중요성이 점점 부각되고 있다 [10-15].

다양한 비감염 합병증이 HIV 감염인에서 많이 발생함에 따라, 이런 비감염 합병증 해결을 위해 수술이 필요한 경우 역시 증가하고 있다 [16]. 그러나, 수술 전후, 특히 약물 흡수와 직결되는 위장관

수술 전후 HIV 감염인에서 ART를 어떻게 사용하는 좋은지에 대한 공고한 권고 사항이나 연구 결과는 여전히 부족하다. 비록 아직 이런 사례들이 진료 현장에서 흔하게 접하지는 않지만, 향후 점점 증가할 것으로 예상된다.

ART를 중단없이 유지하는 것이 항레트로바이러스제 (ARV)의 혈중 농도를 잘 유지하는 것에 필수적이라는 것은 잘 알려져 있다 [17-19]. ART는 HIV 복제를 막고, 내성 발현을 억제함으로써 면역력을 유지시킨다 [20, 21]. 그러나, 일부 장기 수술적 치료를 받는 경우, 기존 정제 제형의 ARV를 유지하는 것이 어려운 경우가 있다. 장기 수술적 치료가 필요한 위장관 수술을 받은 HIV 감염인에서 ART를 적절히 사용하는 방법에 관해서는 보고할 필요가 있다. 따라서, 우리는 장기 수술적 치료가 필요한 HIV 감염인에서 ART

Published online: Aug 14, 2024

교신저자: 최준용, MD, PhD  
연세대학교 의과대학 내과학교실, 에이즈연구소.  
Tel: +82-2-2228-1974, Fax: +82-2-393-6884  
Email: seran@yuhs.ac

© 2024 by The Korean Society of Infectious Diseases, Korean Society for Antimicrobial Therapy, The Korean Society for AIDS, and Korean Society of Pediatric Infectious Diseases

This is an Open Access article distributed under the terms of the Creative Commons Attribution Non-Commercial License (<https://creativecommons.org/licenses/by-nc/4.0/>) which permits unrestricted non-commercial use, distribution, and reproduction in any medium, provided the original work is properly cited.

를 사용했던 경험과 2023년 대한에이즈학회 학술대회에서 토론 내용, 그리고 관련된 선행 연구 내용을 정리해서 보고하고자 한다.

## 증례 보고 및 학술대회 토론

본 증례는 2023년 대한에이즈학회 학술대회 [Exploring Difficult Cases in HIV Clinics] 세션에서 논의되었다. 토론은 발표자가 청중에게 질문하는 것으로 시작되었다. 이어 사회자는 패널리스트들에게 토론에 참여할 것을 요청했고, 패널리스트들은 질문에 답했다. 청중도 토론 중에 자유롭게 참여 할 수 있었다. 토론에 참여한 사회자, 발표자, 패널리스트는 표 1과 같다. 학술대회 토의 내용은 독자들의 이해를 돕기 위해 증례 보고 중에 서술하였다.

55세 남자가 내원 당일 아침부터 시작된 복통을 주소로 응급실을 방문하였다. 그는 병원 방문 전날 약 2시간 동안 (오후 6시부터 8시까지) 알코올 도수 55도 이상의 술 600mL를 마셨다고 했다. 계통 문진 상 그의 의식은 명료하였고 복통을 호소하였다. 신체검사서 혈압은 187/86mmHg, 심박수는 분당 91회, 호흡수는 분당 20회, 체온은 37.8도였다. 복부 전반에 걸쳐 압통과 반발 압통이 관찰되었다.

그는 2007년 12월 처음 HIV 감염으로 확진되었고, 2010년 11월 ART를 받기 시작하였다. 초기 치료로는 Lamivudine (3TC) + zidovudine (ZDV) + lopinavir/ritonavir (LPV/r)를 사용했으며 바이러스는 잘 조절되었다. ARV에 대한 내성 검사 이력은 확인되지 않았다. 2014년 12월부터 elvitegravir/cobicistat/tenofovir disoproxil fumarate/emtricitabine (EVG/c/TDF/FTC)를 처방 받았고, 2017년 8월부터 EVG/c/tenofovir alafenamide/FTC (EVG/c/TAF/FTC)를 처방 받았다. 응급실 입원시점까지 EVG/c/TAF/FTC를 유지하고 있었으며, 2019년 9월 응급실 방문 전 마지막 검사에서 HIV RNA <20 Copy/mL, CD4 T cell count 747/ $\mu$ L 이었다. 그 외에도 고혈압, 당뇨병으로 약을 복용하고 있었다.

초기 혈액검사 결과 백혈구 6510/ $\mu$ L, 헤모글로빈 13.1 g/dL, 혈소판 340,000/ $\mu$ L, blood urea nitrogen/creatinine level of 21.0/1.20 mg/dL (estimated glomerular filtration rate 58 mL/minute 1.73 m<sup>2</sup>), C-reactive protein 51.4mg/L로 확인되었다. 초기 흉부 및 복부 X-ray와 복부 컴퓨터 단층촬영 (CT) 사진은 그림 1과 같다.

표 1. [Exploring Difficult Cases in HIV Clinics] 참여자

|                      |
|----------------------|
| <b>사회자</b>           |
| 김태형 교수 (순천향대학교 의과대학) |
| <b>발표자</b>           |
| 김정호 교수 (연세대학교 의과대학)  |
| <b>패널리스트</b>         |
| 김윤정 교수 (가톨릭대학교 의과대학) |
| 최원석 교수 (고려대학교 의과대학)  |
| 정용필 교수 (울산대학교 의과대학)  |

복부 CT 스캔에서는 광범위한 범위의 경미하게 두꺼워진 소장 벽 소견과 함께 간 주위 및 양쪽 대장 주변의 복수가 확인되었다. 이러한 소견을 바탕으로 환자는 소장의 광범위한 장염, pre-re-nal type의 급성 신 손상, EVG/c/TAF/FTC 복용하며 잘 조절되는 HIV 감염으로 진단되었다. 환자에 대한 치료 계획은 금식과 수분 공급이었다.

### 1. 환자는 장염에 따른 복통으로 인해 금식하고 경구약만 복용하기로 결정하였다. ART는 어떻게 사용할 수 있나?

**김윤정 교수:** 환자가 금식 중이기 때문에 식사와 관계없이 사용 가능한 ART를 고려 할 수 있다. 식사와 상관없이 복용할 수 있는 bicitegravir/TAF/FTC (BIC/TAF/FTC) 나 dolutegravir/abacavir/3TC (DTG/ABC/3TC)로 바꿀 수 있겠다.

**최원석 교수:** 김윤정 교수의 의견에 동의한다. 또한, 환자는 경도의 급성 신장 손상이 있었으나 수분공급 후 회복이 가능한 pre-re-nal type 이고, creatinine 수치도 그다지 높지 않아 현재 신장 기능에 따른 용량 조절 없이 ART를 사용할 수 있을 것으로 보인다.

**김정호 교수:** 본 증례에서는 입원 당시 BIC/TAF/FTC 도입 이후로 BIC/TAF/FTC 사용이 가능했고, 식사와 관계없이 투여가 가능하여 BIC/TAF/FTC로 전환하였다.

입원 5일째 환자는 다량의 토혈을 경험했고, 이로 인해 혈압이 감소하고 급성 신 손상 및 호흡 부전이 발생했다. 이에 기관 내 삽관을 시행하고 지속적 신대체 요법 (CRRT)을 시작했으며 비위관을 삽입했다. 활동성 출혈 부위를 확인하기 위해 후속 복부 CT를 시행했다 (그림 2).

복부 CT 스캔에서는 위와 십이지장에 큰 혈종이 보였지만 명확한 조영제 유출은 없었다. 또한, 왼쪽 하복부의 소장 루프에 인접한 곳에서 free air가 관찰되어 해당 부위의 장 천공이 의심되었다. 아울러, 공장 중앙에서 원위부 상행 결장까지 소장과 대장의 장벽이 조영되지 않은 것으로 의심되었다. 이러한 소견을 고려할 때, 환자는 허혈성 장에 의한 pneumoperitoneum, 공장 중앙부터 원위 상행 결장까지 광범위한 장 경색을 앓고 있는 것으로 진단되었다.

### 2. 기관 내 삽관으로 인한 비위관 삽입 상태를 고려하여 ART를 어떻게 사용할 수 있나?

**김윤정 교수:** 국내에서는 아직 주사형 ARV가 없기 때문에 비위관을 삽입하는 상황에서도 주사제 사용이 불가능하다. 기존 정제 제제 역시 기관 내 삽관 및 비위관 삽입 상태 등을 고려하면 사용이 어려울 것으로 생각된다. 현재 사용중인 BIC/TAF/FTC를 녹여 비위관에 넣어서 사용할 수 있겠다.

**최원석 교수:** 앞으로 이런 사례가 발생할 수 있기 때문에 경구용 약물 외에 주사형 ARV도 도입하는 것이 필요하다. 이 환자의 경우 비위관을 통해 ARV를 투여하더라도 이렇게 상태가 좋지 않은 장

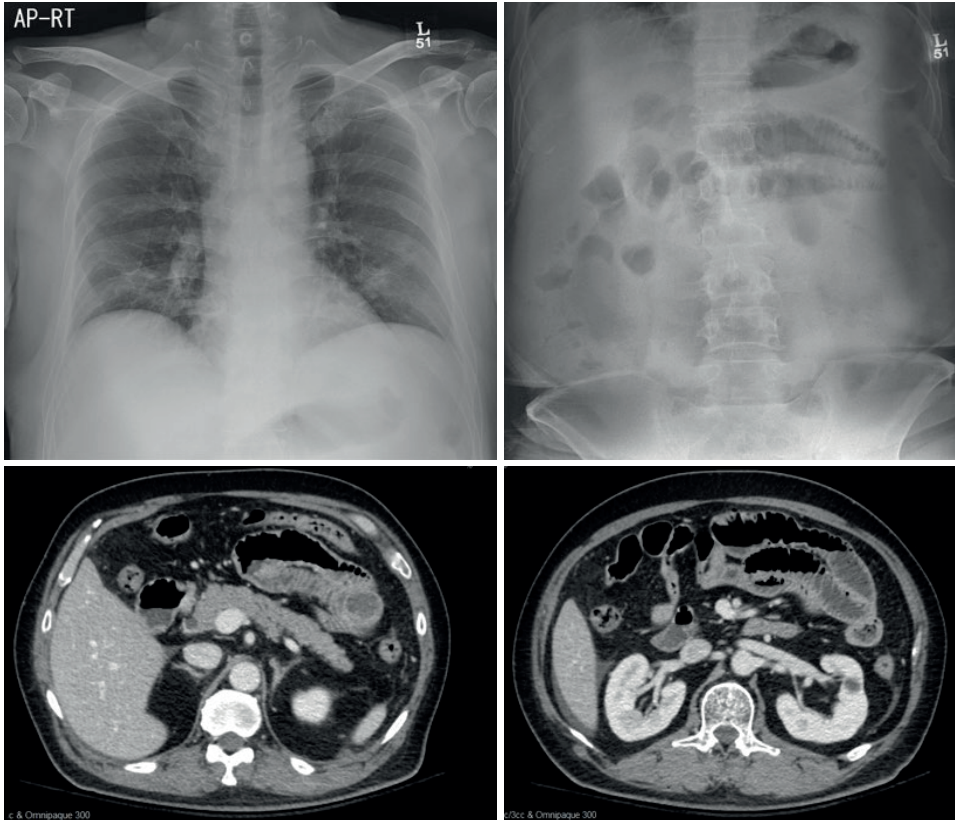

그림 1. 초기 흉부 및 복부 X-ray 및 복부 컴퓨터 단층촬영 이미지

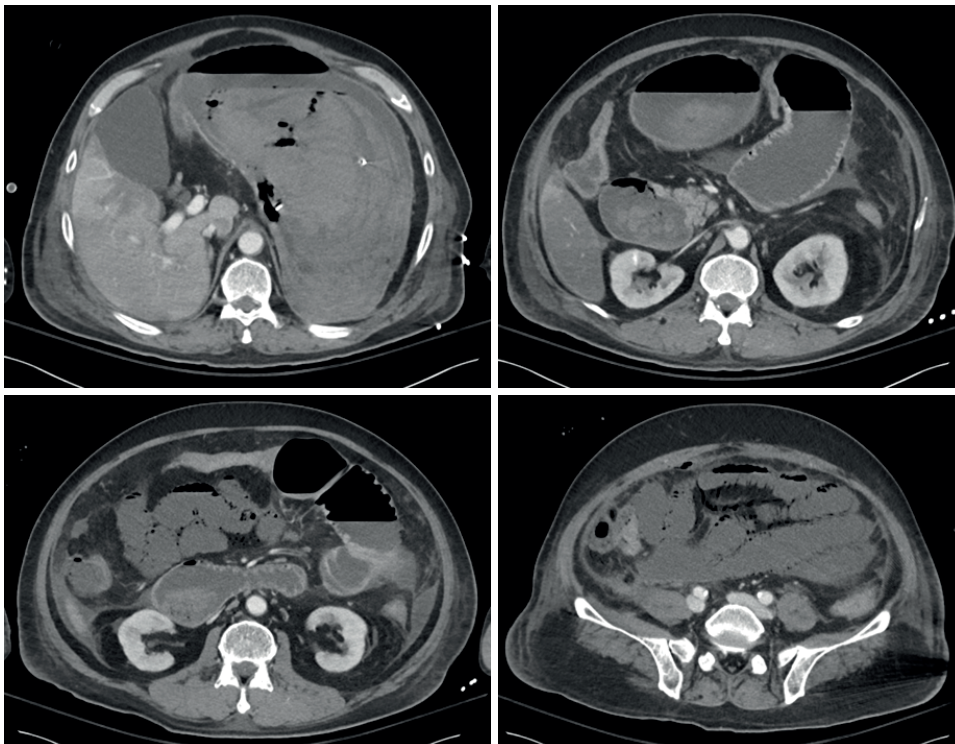

그림 2. 후속 복부 컴퓨터 단층촬영 이미지

에서 약물이 잘 흡수될지는 의문이다. 이 환자처럼 장 과사가 심한 경우 흡수 저하가 우려된다. 따라서 주사 가능한 ARV를 도입할 필요가 있다.

**정용필 교수:** 저는 DTG/ABC/3TC를 분쇄해서 사용해 본 경험이 있다. 이 환자는 심한 장폐색증을 앓고 있다. 그래서 ARV가 잘 흡수될지 걱정이 된다. 제대로 흡수되지 않고 저용량이 체내로 흡수되어 내성이 생길 우려가 있다. 신장 기능이 악화될 수 있다는 우려도 있다. 이러한 요인들을 고려할 때, 최근 ARV가 개선되었고 단기간 중단 후 저항이 발생하는 경우가 흔하지 않기 때문에 ART 중단을 고려해 볼 수도 있다.

**김정호 교수:** 장 과사, 천공, 범복막염으로 인한 긴급 수술로 인해 환자는 일주일 동안 ART를 사용할 수 없었다. 이어서, 환자에게 비위관을 통해 물에 용해된 BIC/TAF/FTC를 투여하였다.

### 3. 지속적 신대체요법을 받는 환자에게 ART를 어떻게 투여해야 하나?

**김윤정 교수:** CRRT를 받는 환자의 ART 사용에 대한 데이터는 제한적이다. 그러나 TAF와 BIC는 단백 결합률이 높은 약제이고, BIC/TAF/FTC는 만성 혈액투석을 하는 HIV 감염인에게 사용하는 경우는 용량 감량 없이 투여하는 것으로 알려져 있다. 따라서 CRRT 중에 사용한다면 역시 동일한 용량의 BIC/TAF/FTC를 투여 할 것 같다.

**정용필 교수:** 일반적으로 CRRT를 받는 동안 ART를 사용하는 것은 짧은 기간 동안 지속될 가능성이 높기 때문에 ARV에 대한 과다 복용에 대한 큰 부담은 없다. 오히려 신체 내 ARV 농도가 불충분 할 수 있다는 우려가 있다. 이전 질문과 마찬가지로 단기간 ART를 중단하는 것도 고려할 수 있다.

**김정호 교수:** CRRT를 받는 환자에게 ART를 투여한 데이터는 없다. TAF와 FTC는 CRRT 중에 부분적으로 제거될 수 있지만 BIC의 단백 결합력이 높기 때문에 제거되지 않을 가능성이 높으며 결론적으로 임상적 영향을 미치기에는 충분하지 않을 것으로 예상되었다. 따라서 기존에 투여한 BIC/TAF/FTC는 이 환자에서 동일한 용량으로 유지되었다.

토혈이 진정되고 혈압이 안정되자 환자는 복막염, 장 허혈, 장 천공 등으로 수술적 치료를 받았다. 수술 조건에는 소장 전체 괴사와 근위부 상행 결장의 괴사가 관찰되었다 (그림 3).

환자는 근위 공장에서 원위 회장까지 (약 4m) 소장 절제술을 받았다. 그는 두 번의 추가 수술을 받았고 마지막 수술에서는 공장-횡단결장루를 만들었다.

#### 4. 광범위 소장 절제술과 공장-횡단결장루술을 받은 환자에게 어떤 ART 요법을 고려할 수 있나?

**최원석 교수:** ARV가 위장관 어디에서 흡수되는지에 대한 정보가 필요하다. 제한된 정보를 고려할 때 기본 옵션은 기존 ART를 유지하는 것이라고 생각한다. 주사 가능한 ARV가 가능하다면 이는 위장관 흡수에 대한 우려 없이 우선적으로 고려될 수 있겠다.

**김윤정 교수:** 위장관 흡수 문제를 고려할 때 저항 장벽이 높은 ARV를 선택하는 것이 좋겠다.

**정용필 교수:** 저는 데이터가 좀 더 많은 DTG/ABC/3TC를 선호한다. 위장관의 어느 부분이 ARV를 주로 흡수하는지가 중요하다. 3TC, TAF, ABC 등의 NRTI는 대부분 십이지장에서 흡수되므로 사용될 수 있을 것으로 보인다. DTG/BIC/darunavir (DRV)의 경우 소장이 없을 때 얼마나 잘 흡수되는지가 중요한 요소이다. 식

사 없이 복용할 수 있는 DTG의 경우, 식사와 함께 섭취하면 흡수율이 최대 50%까지 대폭 증가한다. 따라서 DTG/ABC/3TC를 식사와 함께 투여하는 것이 가능하다.

**김정호 교수:** 이 환자의 경우 가능하다면 공장이나 회장 외부에서 흡수되면서 내성 장벽이 높은 ARV를 일차 선택 요인으로 삼았다. 결과적으로 BIC/TAF/FTC가 유지되었다.

그는 점차 회복되었으며, 기관 절개 부위 봉합 및 경구 식이 재개 후 ART를 다시 정제 제제로 변경했다. 그는 퇴원하였고 단장증후군 (short bowel syndrome)으로 인해 가정 간호를 통해 정기적인 비 경구 영양공급과 전해질 보충을 유지하였다.

## 토론

본 증례는 광범위한 위장관 수술과 이어지는 장기 수술 치료를 받은 HIV 감염인의 ART 사용에 대해 다루었다. 이러한 환자들에 대한 ART의 효과적인 사용은 2023년 대한에이즈학회 학술대회에서 논의되었다. 앞으로 수술, 특히 위장관 수술을 받는 HIV 환자의 수가 증가할 것으로 예상되므로, 이러한 경우에 ART를 어떻게 사용할 수 있을지에 대해 정리하였다. 증례 및 논의의 흐름에 맞춰 몇 가지 주요 주제를 검토할 수 있도록 구성하였다.

#### 1. 수술, 장염, 궤장염 등으로 인해 금식이 예상되는 경우 항레트로바이러스 요법은 어떻게 사용할 수 있을까?

ART를 중단하면 바이러스 반등, 면역 체계 약화, 임상적 악화 등이 발생할 수 있다 [22-26]. 따라서 ART를 중단하는 것은 권장되지 않는다. 그러나 특정 상황에서는 짧은 기간 내에 ART가 중단될 수 있다. 경구 섭취가 어려운 질병 (예: 위장염 또는 궤장염)이나 수술과 같은 다양한 이유로 며칠에서 몇 주에 이르는 ART의 단기 중단이 발생할 수 있다. 단기간 (2일 미만) 동안 ART를 중단하는 경우 일반적으로 ART 조합에 포함된 모든 약물을 일시적으로 중단함으로써 관리할 수 있다. 환자가 심각한 위장 질환으로 인해 약물을 복용할 수 없는 경우, DHHS 지침에서는 약물의 반감기가 다르더라도 ART 요법의 모든 약제를 동시에 중단할 것을 권장한다 [17]. 그리고 문제가 해결되면 모든 구성 약제를 함께 다시 시작해야 한다. 그러나 비뉴클레오사이드 역전사효소 억제제 (non-nucleoside reverse transcriptase inhibitors, NNRTI)인 efavirenz (EFV)와 rilpivirine (RPV)의 경우에는 다른 ARV에 비해 반감기가 상당히 길기 때문에 약물 중단 시 기능적 단독 요법의 위

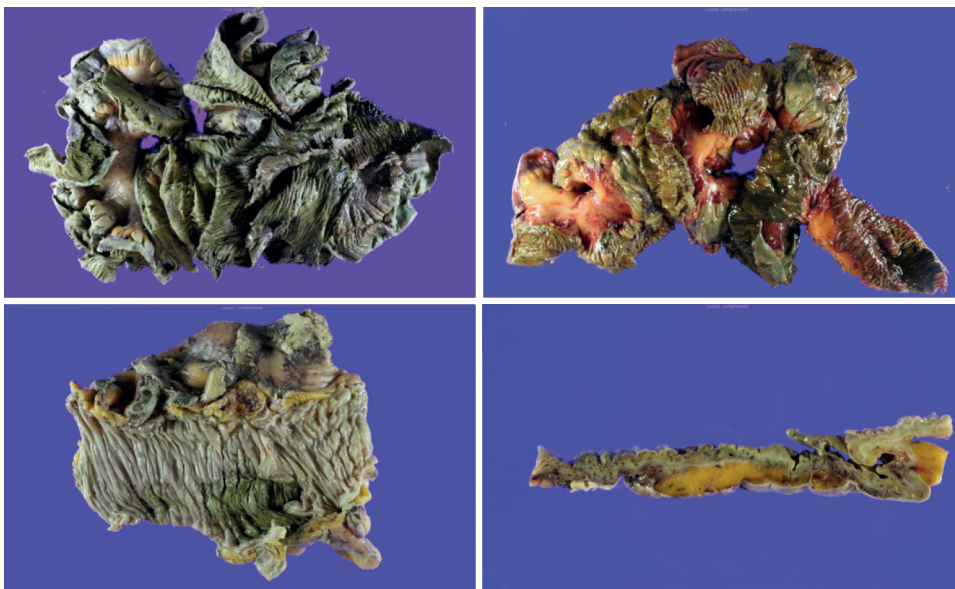

그림 3. 소장 괴사를 보여주는 수술 표본

험성이 있어 주의가 필요하다 [27, 28]. ART 중단이 예상되는 경우, EFV 또는 RPV를 사용하는 경우는 단백질분해효소 억제제 (protease inhibitor, PI) 와 같은 다른 약물로 선제적으로 변경하거나, EFV 또는 RPV를 먼저 중단한 후 2~4주 후에 ART 요법에서 다른 모든 약물을 중단하는 것이 가능하다. 그러나 갑작스러운 중단이 필요한 경우에는 이를 시행하기 어렵다. 2주 이상 ART를 장기간 중단하는 것은 권장되지 않는다. Carbotegravir/RPV와 같은 주사 가능한 ARV는 장기간의 단식이 필요할 때 유용하게 활용될 수 있다.

실제 임상에서는 음식은 못 먹지만 약은 먹을 수 있는 경우도 있으며 이 중에는 장기간 (2주 이상) 음식을 먹지 못하는 경우도 있다. 이러한 상황에서는 음식과 ARV 간의 상호 작용을 고려해야 한다. ARV 중 일부는 식사와 관계없이 복용할 수 있지만, 일부 ARV는 식사와 함께 복용하는지 여부에 따라 약물 흡수 및 약물 혈장 농도가 영향을 받을 수 있다. NNRTI 중 doravirine (DOR)은 음식과 관계없이 투여할 수 있다 [29]. EFV는 음식이 약물 흡수와 중추신경계 독성을 증가시키기 때문에 공복에 섭취하는 것이 권장되는 반면 [30], RPV는 식사와 함께 섭취하는 것이 권장된다 [31]. 또한 RPV는 단식 중에 흔히 사용되는 양성자 펌프 억제제와 병용 금기이므로 주의가 필요하다 [31]. PI 중 atazanavir (ATV)와 DRV의 생체 이용률도 음식과 함께 섭취하면 증가한다 [32, 33]. 현재 널리 사용되는 통합효소 억제제(integrase strand transfer inhibitors, INSTI) 중 BIC, DTG, raltegravir (RAL)는 음식 요구 사항이 없다. 그러나 EVG의 경우, 식사와 함께 약을 복용하는 것이 좋다. 일본에서 진행된 연구에 따르면, 공복 상태에서 EVG/c/TDF/FTC를 투여한 경우 EVG와 TDF의 평균 곡선 하 면적 (AUC)이 각각 50%, 28% 감소한 것으로 나타났다 [34]. 이 연구는 단식 조건에서 EVG와 TDF의 생체 이용률이 음식과 함께 투여되었을 때의 생체 이용률과 동일하지 않다는 결론을 내렸다 [34]. 따라서 장기간의 단식이 예상되는 경우 DRV, ATV 또는 EVG 기반 요법을 사용할 때는 주의가 필요하다. 복용 시 음식에 대한 고려가 필요한 항레트로바이러스제를 표 2에 정리하였다.

## 2. HIV 감염자에게 비위관이 있거나 삼키는 데 어려움이 있어 원래 정제 형태를 복용하기 어려운 경우 항레트로바이러스 요법은 어떻게 사용하나?

HIV 감염자가 기관 내 삽관을 했거나 어떤 이유로든 삼키는 데 어려움이 있는 경우 일반 정제 형태로 ARV를 복용하기가 어렵다.

한국을 포함한 전 세계 많은 지역에서는 아직 주사형 ARV가 도입되지 않았다. 따라서 기존 정제 제제를 사용하는 대체 방법이 필요하다. EACS 버전 12.0에서는 연하 장애가 있는 환자의 ARV 투여에 대해 잘 구성된 표를 제공하고 있다 [18]. 그 외에도 여러 리뷰에서 경장 ARV 투여에 대해 논의하였다 [35, 36]. EACS에 제시된 데이터 외에도 용해되거나 분쇄된 ARV의 PK에 대해 보고되었다. 여기에서는 일부 ARV에 대한 정보를 요약하고자 한다.

BIC/TAF/FTC의 경우 EACS 버전 12.0에서는 정제를 통째로 삼켜야 하며 씹거나 으깨거나 찌개어서는 안 된다고 명시되어 있다. 이 권장 사항에 따르면 기관 내 삽관된 사람이나 삼키는 데 어려움이 있는 사람에게는 사용하기 어렵다. 그러나 이는 BIC/TAF/FTC를 용해하거나 분쇄할 때 PK에 대한 뒷받침 데이터가 부족했기 때문이다. Hocqueloux 등은 건강한 성인을 대상으로 교차 무작위 시험을 실시하고 용해 및 분쇄된 BIC/TAF/FTC의 생체 이용률을 조사했다 [37]. 연구에 따르면 BIC/TAF/FTC 정제는 플라스틱 병에 담긴 물 240mL에 실온에서 6~7분 동안 완전히 용해되었다. 비위관이 있는 사람들에게는 다음 단계가 권장된다.

- 1) 비위관 튜브를 물 30mL로 씻어낸다,
- 2) 물 240mL에 용해된 BIC/TAF/FTC를 비위관을 통해 투여한다,
- 3) 물 30mL로 비위관 튜브를 씻어낸다.

경장 영양을 하는 경우, 다가 금속 양이온과의 상호작용 위험 때문에 BIC/TAF/FTC 투여를 경장 식이와 4시간 간격으로 분리하는 것이 좋다. 용해된 정제의  $C_{max}$ 는 각각 105%/97%/96% 이었고, AUC는 각각 111%/100%/99% 이었다. 분쇄한 경우는 정제의  $C_{max}$ 는 각각 110%/70%/66%이었고, AUC는 각각 107%/86%/84% 이었다. 이 결과에 근거하면, BIC/TAF/FTC를 물에 용해시켜서 사용 할 수 있으나 분쇄하면 TAF 및 FTC 농도가 최적이지 아닐 수 있다. 본 연구결과에 따르면 BIC/TAF/FTC를 통째로 삼킬 수 없는 경우에는 물에 녹여 즉시 복용하는 것을 고려할 수 있다.

BIC 함유 요법 이전에 시장에 출시된 DTG 함유 요법에 대해서도 분쇄 시 생체 이용률에 대해 연구되었다. Roskam-Kwint 등은 DTG/ABC/3TC를 분쇄해서 경장 투여한 경우의 효과를 조사했다 [38]. 결과적으로 DTG/ABC/3TC를 분쇄하면 DTG 농도가 높아지고 (AUC: +26% 및  $C_{max}$ : +30%) ABC의  $C_{max}$ 는 감소했

표 2. 복용 시 음식에 대한 고려가 필요한 항레트로바이러스제

| 항레트로바이러스제                      | 음식에 대한 고려 사항                                                       |
|--------------------------------|--------------------------------------------------------------------|
| EFV-based regimens             | 음식은 EFV의 흡수를 증가시켜서 중추신경계 부작용을 증가시킬 수 있음.                           |
| RPV-based regimens             | 음식은 흡수를 향상시킴. RPV 기반 요법은 적절한 흡수를 보장하기 위해 최소 390칼로리의 음식과 함께 섭취해야 함. |
| ATV/r- or ATV/c-based regimens | 음식은 흡수를 향상시킴.                                                      |
| DRV/r- or DRV/c-based regimens | 음식은 흡수를 향상시킴.                                                      |
| EVG/c/TDF/FTC                  | 음식은 흡수를 향상시킴.                                                      |
| EVG/c/TAF/FTC                  | 음식은 흡수를 향상시킴.                                                      |

EFV, efavirenz; RPV, rilpivirine; ATV/r, ritonavir-boosted atazanavir; ATV/c, cobicistat boosted atazanavir; DRV/r, ritonavir boosted darunavir; DRV/c, cobicistat boosted darunavir; EVG/c/TDF/FTC, elvitegravir/cobicistat/tenofovir disoproxil fumarate/emtricitabine; EVG/c/TAF/FTC, elvitegravir/cobicistat/tenofovir alafenamide/emtricitabine

다 (-17%). 3TC 농도는 크게 영향을 받지 않았다. 이 경우의 높은 DTG 농도는 음식과 함께 섭취한 DTG의 농도 또는 하루 2회 투여 시의 농도를 초과하지는 않았다. 따라서 저자들은 DTG/ABC/3TC를 분쇄하여 경장 내 투여할 수 있다고 결론지었다. 본 연구 결과에 따르면, 별도로 연구되지는 않았지만 DTG/3TC의 단일 정제(single-tablet regimen, STR)를 분쇄하여 경장 내 투여도 할 수 있을 것으로 예상된다.

PI 중에서 저항 장벽이 가장 높은 DRV의 경우 경구 현탁액 제제가 일부 국가에서는 이용 가능하다. 그러나 한국을 포함하여 경구 현탁액을 사용할 수 없는 국가에서는 DRV를 정제 형태로 투여해야 한다. 연하 장애가 있는 환자에게 DRV/r을 분쇄하여 사용한 사례 보고가 여러 건 발표되었다 [39-41]. 이 연구들에서는 DRV/r을 분쇄하여 경장 튜브를 통해 사용한 경우에도 혈청 DRV 농도 또는 바이러스 억제에 특별한 문제가 없다고 보고하였다. DRV/c/TAF/FTC STR에 대한 연구 결과도 보고된 바 있다 [42]. 해당 연구에서는 DRV/c/TAF/FTC STR을 쪼개거나 분쇄해서 복용한 경우를 표준 복용법인 통째로 삼킨 경우와 비교하였다. 쪼개서 사용한 경우 각 DRV/c/TAF/FTC 성분의 생체 이용률은 전체 정제를 통째로 삼킨 경우의 생체 이용률과 비슷한 것으로 나타났다. 대조적으로, 분쇄된 정제는 DRV/c의 경우는 전체 정제를 통째로 삼킨 경우와 유사한 생체 이용률을 나타냈지만, TAF의 경우는 생체 이용률이 전체 정제를 통째로 삼킨 경우에 비해  $C_{max}$  29% 및 AUC 19% 만큼 감소했다. 저자들은 이 변화의 임상적 중요성을 평가하지는 못했지만 본 약물의 광범위한 치료 범위를 고려할 때 미미할 것

로 예상된다고 언급했다. 이런 연구 결과를 정리하면, 위의 BIC/TAF/FTC 연구 결과와 유사하게 TAF의 경우 분쇄 시 농도 저하가 발생할 수 있다. 다만, 적어도 DRV/c의 경우에는 쪼개거나 분쇄하여 사용할 수 있다. 따라서 제조업체는 분쇄 정제를 권장하지 않지만 EACS 지침 12.0에서는 분쇄된 DRV/c 정제를 사용할 수 있다고 명시하고 있다 [18].

최신 NNRTI인 DOR의 경우 분쇄 또는 용해 시 사용에 관한 PK 데이터가 아직 없다. M184V 돌연변이가 있는 HIV 감염인에서 nasojeunal feeding tube를 통해 분쇄된 DOR을 DTG 및 3TC와 함께 사용하여 바이러스 억제가 유지되었다는 증례 보고가 있다 [43]. 그러나 이는 함께 투약된 DTG에 의해서 바이러스 억제가 유지되었을 수도 있다. DOR에 대한 약물 농도를 측정할 수 없었기 때문에 분쇄된 DOR의 생체 이용률과 전체 정제의 생체 이용률을 비교하는 것은 불가능하다. 따라서 EACS 가이드라인 12.0에서도 DOR 및 DOR 기반 STR인 DOR/TDF/3TC의 경우 정제를 통째로 삼킬 것을 권고하고 있다 [18].

분쇄 또는 용해하여 사용할 수 있거나 사용할 수 없는 대표적인 ARV에 대한 정보와 참고문헌을 표 3에 정리하였다. 주사 가능한 ART가 사용 가능한 경우 주사도 고려할 수 있다.

### 3. HIV 감염인이 지속적 신대체요법을 받는 경우 항레트로바이러스 요법을 어떻게 사용하나?

CRRT 중 ART 사용과 관련하여 EACS 버전 12.0과 DHHS 지침

표 3. 분쇄 또는 용해하여 사용할 수 있거나 사용할 수 없는 항레트로바이러스제

| Antiretrovirals | Information                                                                                | References |
|-----------------|--------------------------------------------------------------------------------------------|------------|
| <b>STR</b>      |                                                                                            |            |
| BIC/TAF/FTC     | 물에 녹여 즉시 복용하는 것 고려 가능                                                                      | [37]       |
| DTG/ABC/3TC     | 분쇄하여 관을 통해 경장으로 투여 가능                                                                      | [38]       |
| DTG/3TC         | 분쇄하여 관을 통해 경장으로 투여 가능                                                                      | [38]       |
| DOR/TDF/3TC     | 분쇄 및 용해에 대한 PK 데이터가 없기에 정제 복용 권고                                                           | [43]       |
| <b>NRTI</b>     |                                                                                            |            |
| TAF/FTC         | 물에 녹여 즉시 복용하는 것 고려 가능. 분쇄는 TAF 생체 이용률을 감소시킬 수 있지만 TAF/FTC PK에는 큰 영향을 미치지 않음                | [37,42]    |
| TDF/FTC         | 물에 녹여 즉시 복용하는 것 고려 가능                                                                      | [18]       |
| 3TC             | 분쇄하여 관을 통해 경장으로 투여 가능                                                                      | [38]       |
| FTC             | 물에 녹여 즉시 복용하는 것 고려 가능                                                                      | [37]       |
| ABC             | 분쇄하여 관을 통해 경장으로 투여 가능                                                                      | [38]       |
| <b>INSTI</b>    |                                                                                            |            |
| DTG             | 분쇄하여 관을 통해 경장으로 투여 가능. DTG를 분쇄하면 DTG 농도가 높아지지만 음식과 함께 복용하는 경우 또는 하루 2회 복용하는 경의 농도를 초과하지 않음 | [38]       |
| RAL             | 정제를 씹으면 약물 흡수가 높아지고 약물 대상 간 PK 변동성이 낮아짐                                                    | [44]       |
| <b>PI</b>       |                                                                                            |            |
| DRV             | 분쇄하여 관을 통해 경장으로 투여 가능                                                                      | [39-41]    |
| DRV/c           | 분쇄하여 관을 통해 경장으로 투여 가능                                                                      | [42]       |
| LPV/r           | 분쇄된 정제 복용의 경우 AUC가 크게 낮아짐                                                                  | [45]       |
| <b>NNRTI</b>    |                                                                                            |            |
| DOR             | 정제를 분쇄하거나 용해시키는 것은 권장되지 않음                                                                 | [43]       |
| ETV             | ≥5 mL 물에 녹인 경우 전체 정제와 생물학적 동등성을 나타냄                                                        | [46]       |

STR, single-tablet regimen; BIC, bicitgravir; TAF, tenofovir alafenamide; FTC, emtricitabine; DTG, dolutegravir; ABC, abacavir; 3TC, lamivudine; DOR, doravirine; TDF, tenofovir disoproxil fumarate; PK, pharmacokinetics; NRTI, nucleoside reverse transcriptase inhibitors; INSTI, integrase strand transfer inhibitor; RAL, raltegravir; PI, protease inhibitor; DRV, darunavir; DRV/r, ritonavir boosted darunavir; DRV/c, cobicistat boosted darunavir; LPV/r, ritonavir boosted lopinavir; NNRTI, non-nucleoside reverse transcriptase inhibitors; ETV, etravirine.

모두 만성 혈액 투석만 언급하고 CRRT에 대한 정보는 제공하지 않는다 [17, 18]. 2014년 미국감염학회에서는 HIV 감염인의 만성 신장질환에 대한 임상진료지침을 개정하였지만 [47], CRRT를 받을 때 ART 투여 방법에 대해서는 언급하지 않았다. 이는 CRRT가 ARV의 약물 농도나 HIV 감염인의 ART 효과에 어떤 영향을 미치는지에 대한 연구가 수행되지 않았기 때문이다. 그 이유는 1) CRRT를 받는 HIV 감염인의 수가 소수라는 점, 2) 중증 질환에 걸린 사람에 대한 연구가 어렵다는 점, 3) CRRT가 일반적으로 짧은 기간 동안 사용된다는 점 등을 들 수 있으며 이런 이유로 연구의 필요성이 상대적으로 낮다고도 할 수 있다. 더욱이 CRRT의 경우 약물 제거율은 환자의 남은 신장 기능, 유출량, 필터 유형 및 신장 대체 방법에 따라 달라진다. 따라서 동일한 기준에 따라 권장 사항을 제시하는 것은 어렵다. 그럼에도 불구하고, 향후 CRRT를 필요로 하는 HIV 감염인의 수가 증가할 수 있으며 [48, 49], 그러한 경우 CRRT 동안 ART를 투여하는 방법에 대해 조금이나마 설명하는 것이 도움이 될 수 있다.

일반적으로 단백질 결합력이 높은 약물은 CRRT로 제거되지 않는다 [50]. 본 증례에서 사용된 BIC/TAF/FTC의 경우 FTC의 단백질 결합은 4% 미만이지만 BIC의 단백질 결합은 99% 이상, TAF의 단백질 결합은 80%에 이른다. 따라서 CRRT 시 FTC의 많은 부분과 TAF의 일부가 제거될 수 있지만, BIC/TAF/FTC는 BIC와 TAF의 단백질 결합력이 높기 때문에 용량 조절 없이 사용하는 것을 고려해 볼 수 있다. 단백질 결합률이 매우 높은 DTG 및 DRV 역시 BIC와 유사하게 CRRT 중에 용량 조절 없이 사용하는 것을 고려할 수 있다. CRRT는 일반적으로 짧은 기간 동안 시행되지만, CRRT 중에 ART를 투여할 경우 부작용이 있는지, 효과가 충분한지 모니터링하는 것이 중요하다.

#### 4. 위장관 절제술을 받은 HIV 감염인에게 항레트로바이러스 요법을 어떻게 사용하나?

위장관 절제술을 받은 환자에게 ART를 사용하는 경우 ARV가 위장관 어느 부위에서 주로 흡수되는 지를 고려할 필요가 있다. 위장관 절제술은 부위에 따라 위 절제술, 소장 절제술, 대장 절제술로 분류할 수 있다. 이 중 대부분의 데이터는 최근 HIV 감염인에서 점차 중요한 주제가 되는 체중 증가와 관련하여 체중 감량을 위해 시행되기도 하는 위 절제술에서 나온 것이다 [51, 52].

위 절제술에 의한 영향은 위를 얼마나 제거했는지에 따라 차이가 있다. 위 절제술은 일반적으로 위 용적 및 흡수 표면적 감소, 운동성 저하 및 위 pH 증가를 초래한다 [53]. 따라서 위 절제술을 받은 환자에서는 위 pH 증가로 인해 ATV와 RPV의 흡수가 저하될 수 있어 사용이 어렵다 [54, 55]. 몇몇 연구에서 위 절제술을 받은 환자에서의 ARV에 대한 PK가 보고되었다. 비록 대부분의 연구는 증례 보고 수준이지만 제한된 데이터만 사용할 수 있는 경우 이러한 데이터도 도움이 될 수 있다. 일반적으로 PK 변화는 수술 후 초기에 두드러진다 [56]. 따라서 위 절제술 후 ARV의 PK에 관한 연구 결과를 검토할 때에는 수술 후 언제 검사를 했는지를 고려할 필요가 있다. 임상에서 일반적으로 사용되는 ARV에 대한 위 절제술 후 PK에 대한 정보는 다음과 같다.

Tempestilli 등은 Billroth II 위 절제술과 위암에 대한 Roux-en-Y 재건술을 받은 환자에서의 BIC/TAF/FTC 사용 경험을 보고했다 [57]. 그들은 수술 2개월 후 BIC/TAF/FTC를 사용하는 환자의 약물 혈장 농도를 조사한 결과, BIC의 PK 변수가 약간 감소하였지만 항바이러스 효능에 영향을 주지 않음을 발견했다. 그들은 또한 TAF와 FTC 혈장 농도의 증가를 발견했는데, 이는 위 절제술에도 불구하고 두 ARV의 높은 생체 이용률을 시사한다. 따라서 그들은 BIC/TAF/FTC의 고정 용량 병용요법이 위 절제술을 받은 HIV 환자에서 부작용 없이 높은 CD4 세포 수와 안정적인 혈장 바이러스 억제를 효과적이고 안전하게 유지한다는 결론을 내렸다. 다만, 본 연구는 수술 2개월 후의 약물 혈장 농도를 측정하였기에, 수술 후 초기 약물 혈장 농도는 다루지 못했다.

위 우회술을 받은 HIV 환자에게 DTG를 사용한 case series도 보고되었다 [58]. 이 연구에 따르면 위 우회술을 받은 환자에서의 장기 DTG 농도는 기존에 일반적으로 알려진 DTG 농도 자료와 유사하였다. 수술 후 초기에는 연구에 참여한 HIV 감염인 4명 중 3명이 1일 1회 투여한 경우 예상되는 범위의 DTG 농도를 보였다. 나머지 1명의 HIV 감염인은 1일 1회 투여하며 수술 후 2주째 측정된 DTG 농도가 0.5mg/ml로 측정했다. 이 감염인에서는 약물 농도가 부적절할 위험이 있으므로 DTG 투여량을 50mg 1일 2회로 늘렸다. 수술 2개월 후, 하루 2회 복용하는 일정에서의 DTG 농도는 충분했다. 이후 복용량을 다시 1일 1회 50mg으로 줄였으며 지속적으로 최적의 DTG 농도를 달성했다. 이 증거를 요약하면 DTG는 수술 후 초기 기간 동안에도 하루에 한 번 사용할 수 있다. 다만, 흡수와 약물 농도에 대한 우려가 있는 경우, 수술 후 첫 2개월 동안 DTG 1일 2회 투여를 고려할 수 있다. 또한, 이 결과는 위 수술 후 다양한 시점에서 PK를 조사해야 할 필요성을 강조한다. 한편, bariatric surgery 후에는 미네랄 보충제를 투여할 수 있다. BIC, DTG와 같은 INSTI를 사용하는 경우 미네랄과의 킬레이트화로 인한 INSTI의 흡수 장애를 방지하기 위해 미네랄 보충제 섭취와 분리해야 한다 [56].

위 절제술 후 DRV/r 사용에 관한 연구도 보고되었다 [59, 60]. DTG와 유사하게, 이 연구에서는 수술 후 3일 후에 DRV/r의 혈장 농도가 일시적으로 감소하는 것으로 나타났다. 그러나 바이러스 복제를 억제하는 데 필요한 농도는 유지되었으며 수술 후 10주 후에 농도는 기준 농도와 비슷했다. 따라서 위 절제술을 받은 환자에게도 DRV/r을 사용할 수 있으며, DTG와 마찬가지로 수술 후 첫 2개월 이내에는 DRV/r의 2회 사용을 고려할 수 있다.

3TC, FTC, TDF, TAF 등 일반적으로 사용되는 NRTI의 결과는 연구에 따라 다르다. 그러나 위에서 언급한 ARV와 유사하게 혈장 농도의 일시적이고 가역적인 감소는 일반적으로 CD4 세포 및 HIV 바이러스 부하에 영향을 주지 않고 수술 후 초기에 주로 관찰된다. 이후 혈장 농도는 큰 문제 없이 유지되었다 [60-62]. 따라서 위 절제술을 받은 환자에게 DTG나 DRV를 핵심 약물로 NRTI와 병용 투여할 경우 특별한 문제가 없을 가능성이 높다. 그러나 Roux-en-Y 문합으로 위 전절제술을 받은 환자에게 노출 전 예방요법 (PrEP)으로 TDF/FTC를 투여했을 때 표준 용량 투여 시 기

준 농도에 비해 두 물질 모두 AUC 및  $C_{min}$ 의 감소가 확인되었고 이는 PrEP의 효과를 손상시킬 수 있다 [63]. 따라서 위 절제술을 받은 환자에서 PrEP으로 TDF/FTC를 사용하는 경우 가능하다면 치료 약물 모니터링 (TDM)을 통해 농도를 모니터링하는 것이 도움이 될 수 있다. 위 절제술을 받은 환자의 ART 사용에 대한 현재 증거는 다음과 같이 요약될 수 있다.

- 1) 위 절제술은 일반적으로 위 용적 및 흡수 표면적을 감소시키고 위 운동성을 저하시키며 위 pH를 증가시켜 ARV의 흡수에 영향을 미친다.
- 2) PK 변화는 수술 후 초기에 두드러지며, 이 기간 동안 대부분의 ARV의 혈장 농도가 감소한다. 따라서, 이 기간 (수술 후 2개월 동안) 동안 DTG 또는 DRV의 하루 2회 투여를 고려할 수 있다.
- 3) 그럼에도 불구하고 일반적으로 사용되는 ART에서 치료 실패의 위험이 증가하지는 않으며 ARV의 혈장 농도는 시간이 지남에 따라 회복되는 경우가 많다.
- 4) INSTI 사용시 미네랄 보충제와의 동시 투여는 흡수를 감소시킬 수 있으므로 피한다.
- 5) 가능하다면 TDM이 투여량 결정에 도움이 될 수 있다.

본 종설에서 다룬 증례는 광범위한 소장 절제술로 인한 단장증후군에 대한 ART 증례이다. 소장을 절제할 경우 절제 정도에 따라 흡수에 미치는 영향이 달라질 수 있다. 절제 범위가 넓을수록 흡수 가능한 면적은 작아지고, 장 통과 시간이 짧아질수록 흡수가 어려워질 수 있다. 또한 소장 절제술 후 여러 메커니즘이 약물 흡수에 영향을 미칠 수 있다 [64, 65]. 그러나 ART를 받는 환자의 광범위한 소장 절제술은 드물고 관련 연구도 제한적이다. 일본에서 단 1건의 사례 보고가 출판되었다 [66]. 이 증례 보고는 장간막 허혈로 인해 소장 절제술을 받은 단장증후군 환자에서 ART의 사용에 대해 다루었다. 환자에게는 DRV, etravirine, LPV, maraviroc, RAL, ritonavir를 투여하고 혈장 농도를 측정하였다. 여러 번 측정된 결과, 충분한 혈장 농도가 유지되지 않았다. 따라서 다회 투여가 이루어졌다. 해당 증례는 2세대 INSTI 등의 약물이 포함되지 않았다는 점에서 한계가 있지만, 소장을 광범위하게 절제한 환자에서는 ARV의 혈장 농도를 유지하기 어렵다는 점을 보여주며, 이 환자들에게 주사 가능한 ARV의 필요성이 높다는 것을 시사한다.

ARV 흡수에 대한 대장 절제술의 효과는 제한적이다. 이는 대부분의 ARV가 십이지장, 공장, 회장을 포함한 소장에서 흡수되기 때문이다. 따라서 ART는 전체 대장 절제술을 받은 환자에서도 용량 조절 없이 투여할 수 있다. 위장 수술 후 ARV 흡수에 관한 자세한 내용은 University of Liverpool에서 제공하는 'Prescribing Resources'에 잘 문서화되어 있다 [67].

결론적으로 HIV 감염인의 평균 수명이 길어짐에 따라 HIV 감염인과 다양한 동반 질환의 수도 증가할 것으로 예상된다. 이에 따라 기계 환기, CRRT 등 중환자 치료가 필요한 HIV 감염자나 암, 비만 등으로 위장관 절제술을 받는 환자가 늘어날 것으로 예상된다. HIV 감염인의 예후는 지속적이고 효과적인 ART 유지에 달려

있기 때문에 HIV를 치료하는 의사는 이런 경우에 ART를 효과적으로 유지하는 방법에 대해 인지해야 하며 이 분야에는 여전히 더 많은 연구와 데이터가 필요하다.

## REFERENCES

1. Katz IT, Maughan-Brown B. Improved life expectancy of people living with HIV: who is left behind? *Lancet HIV* 2017;4:e324-6. [PUBMED](#) | [CROSSREF](#)
2. Trickey A, Sabin CA, Burkholder G, Crane H, d'Arminio Monforte A, Egger M, Gill MJ, Grabar S, Guest JL, Jarrin I, Lampe FC, Obel N, Reyes JM, Stephan C, Sterling TR, Teira R, Touloumi G, Wasmuth JC, Wit F, Wittkop L, Zangerle R, Silverberg MJ, Justice A, Sterne JAC. Life expectancy after 2015 of adults with HIV on long-term antiretroviral therapy in Europe and North America: a collaborative analysis of cohort studies. *Lancet HIV* 2023;10:e295-307. [PUBMED](#) | [CROSSREF](#)
3. Mahy M, Autenrieth CS, Stanecki K, Wynd S. Increasing trends in HIV prevalence among people aged 50 years and older: evidence from estimates and survey data. *AIDS* 2014;28 Suppl 4:S453-9. [PUBMED](#) | [CROSSREF](#)
4. Autenrieth CS, Beck EJ, Stelzle D, Mallouris C, Mahy M, Ghys P. Global and regional trends of people living with HIV aged 50 and over: Estimates and projections for 2000-2020. *PLoS One* 2018;13:e0207005. [PUBMED](#) | [CROSSREF](#)
5. Lee M, Park WB, Kim ES, Kim Y, Park SW, Lee E, Oh MD, Kim NJ, Kim HB, Song KH, Choe PG, Kang CK, Lee CM, Choi Y, Moon SM, Choi SJ, Jeon J, Bang J. Possibility of decreasing incidence of human immunodeficiency virus infection in Korea. *Infect Chemother* 2023;55:451-9. [PUBMED](#) | [CROSSREF](#)
6. Kim JH, Noh J, Kim W, Seong H, Kim JH, Lee WJ, Baek Y, Hyun J, Sohn Y, Cho Y, Kim MH, Ahn S, Lee Y, Ahn JY, Jeong SJ, Ku NS, Yeom JS, Kim C, Choi JY. Trends of age-related non-communicable diseases in people living with HIV and comparison with uninfected controls: a nationwide population-based study in South Korea. *HIV Med* 2021;22:824-33. [PUBMED](#) | [CROSSREF](#)
7. Jespersen NA, Axelsen F, Dollerup J, Nørgaard M, Larsen CS. The burden of non-communicable diseases and mortality in people living with HIV (PLHIV) in the pre-, early- and late-HAART era. *HIV Med* 2021;22:478-90. [PUBMED](#) | [CROSSREF](#)
8. Bae JY, Kim SM, Choi Y, Choi JY, Kim SI, Kim SW, Park BY, Choi BY, Choi HJ. Comparison of three cardiovascular risk scores among HIV-infected patients in Korea: The Korea HIV/AIDS cohort study. *Infect Chemother* 2022;54:409-18. [PUBMED](#) | [CROSSREF](#)
9. Park S, Park SY, Lee E, Kim TH, Lee E. The role of age in subclinical atherosclerosis in Asian people living with human immunodeficiency virus. *Infect Chemother* 2022;54:308-15. [PUBMED](#) | [CROSSREF](#)
10. Jung H, Lee E, Ro JS, Lee JY, Bang J. Mortality after acute coronary syndrome in human immunodeficiency virus infection with optimal adherence: a nationwide study. *Infect Chemother* 2023;55:471-8. [PUBMED](#) | [CROSSREF](#)
11. Seong H, Choi Y, Ahn KH, Choi JY, Kim SW, Kim SI, Kee MK, Choi BY, Park B, Hyun HJ, Yoon JG, Noh JY, Cheong HJ, Kim WJ, Song JY. Assessment of disease burden and immunization rates for vaccine-preventable diseases in people living with HIV: the Korea HIV/AIDS cohort study. *Infect Chemother* 2023;55:441-50. [PUBMED](#) | [CROSSREF](#)



12. Duffy M, Ojikutu B, Andrian S, Sohng E, Minior T, Hirschhorn LR. Non-communicable diseases and HIV care and treatment: models of integrated service delivery. *Trop Med Int Health* 2017;22:926-37. [PUBMED](#) | [CROSSREF](#)
13. Lee JA, Kim Y, Lee JY, Park S, Choi JY. Identifying the unmet medical needs of HIV-positive subjects in Korea: results of a nationwide online survey. *Infect Chemother* 2023;55:397-402. [PUBMED](#) | [CROSSREF](#)
14. Choi JP, Lee JH, An JM, Kim J, Won N, Choi YH. The story and implications of the Korean health care facility counseling project on people living with HIV. *Infect Chemother* 2023;55:167-78. [PUBMED](#) | [CROSSREF](#)
15. Kim JH, Kim JM, Ye M, Lee JI, Na S, Lee Y, Short D, Choi JY. Implementation of a nurse-delivered cognitive behavioral therapy for adherence and depression of people living with HIV in Korea. *Infect Chemother* 2022;54:733-43. [PUBMED](#) | [CROSSREF](#)
16. Gahagan JV, Halabi WJ, Nguyen VQ, Carmichael JC, Pigazzi A, Stamos MJ, Mills SD. Colorectal surgery in patients with HIV and AIDS: trends and outcomes over a 10-year period in the USA. *J Gastrointest Surg* 2016;20:1239-46. [PUBMED](#) | [CROSSREF](#)
17. Clinicalinfo.HIV.gov. Guidelines for the use of antiretroviral agents in adults and adolescents with HIV. Available at: <https://clinicalinfo.hiv.gov/en/guidelines/adult-and-adolescent-arv>. Accessed 23 April 2024.
18. European AIDS Clinical Society (EACS). Guidelines Version 12.0 October 2023. Available at: <https://www.eacsociety.org/media/guidelines-12.0.pdf>. Accessed 23 April 2024.
19. Seong H, Choi Y, Kim M, Kim JH, Song JY, Kim SW, Kim SI, Kim YJ, Park DW, Park B, Choi BY, Choi JY. Rate of and risk factors for loss to follow up in HIV-infected patients in Korea: the Korea HIV/AIDS cohort study. *Infect Chemother* 2023;55:69-79. [PUBMED](#) | [CROSSREF](#)
20. Arts EJ, Wainberg MA. Mechanisms of nucleoside analog antiviral activity and resistance during human immunodeficiency virus reverse transcription. *Antimicrob Agents Chemother* 1996;40:527-40. [PUBMED](#) | [CROSSREF](#)
21. Oh SM, Bang J, Park SW, Lee E. Resistance trends of antiretroviral agents in people with human immunodeficiency virus in Korea, 2012 - 2020. *Infect Chemother* 2023;55:328-36. [PUBMED](#) | [CROSSREF](#)
22. Holkmann Olsen C, Mocroft A, Kirk O, Vella S, Blaxhult A, Clumeck N, Fisher M, Katlama C, Phillips AN, Lundgren JD; EuroSIDA study group. Interruption of combination antiretroviral therapy and risk of clinical disease progression to AIDS or death. *HIV Med* 2007;8:96-104. [PUBMED](#) | [CROSSREF](#)
23. Kousignian I, Abgrall S, Grabar S, Mahamat A, Teicher E, Rouveix E, Costagliola D; Clinical Epidemiology Group of the French Hospital Database on HIV. Maintaining antiretroviral therapy reduces the risk of AIDS-defining events in patients with uncontrolled viral replication and profound immunodeficiency. *Clin Infect Dis* 2008;46:296-304. [PUBMED](#) | [CROSSREF](#)
24. Danel C, Moh R, Minga A, Anzian A, Ba-Gomis O, Kanga C, Nzunetu G, Gabillard D, Rouet F, Sorho S, Chaix ML, Eholié S, Menan H, Sauvageot D, Bissagnene E, Salamon R, Anglaret X; Trivacan ANRS 1269 trial group. CD4-guided structured antiretroviral treatment interruption strategy in HIV-infected adults in west Africa (Trivacan ANRS 1269 trial): a randomised trial. *Lancet* 2006;367:1981-9. [PUBMED](#) | [CROSSREF](#)
25. DART Trial Team. Fixed duration interruptions are inferior to continuous treatment in African adults starting therapy with CD4 cell counts < 200 cells/microl. *AIDS* 2008;22:237-47. [PUBMED](#) | [CROSSREF](#)
26. Strategies for Management of Antiretroviral Therapy (SMART) Study Group; El-Sadr WM, Lundgren J, Neaton JD, Gordin F, Abrams D, Arduino RC, Babiker A, Burman W, Clumeck N, Cohen CJ, Cohn D, Cooper D, Darbyshire J, Emery S, Fätkenheuer G, Gazzard B, Grund B, Hoy J, Klingman K, Losso M, Markowitz N, Neuhaus J, Phillips A, Rappoport C. CD4+ count-guided interruption of antiretroviral treatment. *N Engl J Med* 2006;355:2283-96.
27. Maggiolo F. Efavirenz: a decade of clinical experience in the treatment of HIV. *J Antimicrob Chemother* 2009;64:910-28. [PUBMED](#) | [CROSSREF](#)
28. Ford N, Lee J, Andrieux-Meyer I, Calmy A. Safety, efficacy, and pharmacokinetics of rilpivirine: systematic review with an emphasis on resource-limited settings. *HIV AIDS (Auckl)* 2011;3:35-44. [PUBMED](#) | [CROSSREF](#)
29. Colombier MA, Molina JM. Doravirine: a review. *Curr Opin HIV AIDS* 2018;13:308-14. [PUBMED](#) | [CROSSREF](#)
30. Vrouenraets SM, Wit FW, van Tongeren J, Lange JM. Efavirenz: a review. *Expert Opin Pharmacother* 2007;8:851-71. [PUBMED](#) | [CROSSREF](#)
31. Garvey L, Winston A. Rilpivirine: a novel non-nucleoside reverse transcriptase inhibitor. *Expert Opin Investig Drugs* 2009;18:1035-41. [PUBMED](#) | [CROSSREF](#)
32. Le Tiec C, Barrail A, Goujard C, Taburet AM. Clinical pharmacokinetics and summary of efficacy and tolerability of atazanavir. *Clin Pharmacokinet* 2005;44:1035-50. [PUBMED](#) | [CROSSREF](#)
33. Rittweger M, Arastéh K. Clinical pharmacokinetics of darunavir. *Clin Pharmacokinet* 2007;46:739-56. [PUBMED](#) | [CROSSREF](#)
34. Shiomi M, Matsuki S, Ikeda A, Ishikawa T, Nishino N, Kimura M, Irie S. Effects of a protein-rich drink or a standard meal on the pharmacokinetics of elvitegravir, cobicistat, emtricitabine and tenofovir in healthy Japanese male subjects: a randomized, three-way crossover study. *J Clin Pharmacol* 2014;54:640-8. [PUBMED](#) | [CROSSREF](#)
35. San C, Lê MP, Matheron S, Mourvillier B, Caseris M, Timsit JF, Wolff M, Yazdanpanah Y, Descamps D, Peytavin G. Management of oral antiretroviral administration in patients with swallowing disorders or with an enteral feeding tube. *Med Mal Infect* 2020;50:537-44. [PUBMED](#) | [CROSSREF](#)
36. Walker CK, Shaw CM, Moss Perry MV, Claborn MK. Antiretroviral therapy management in adults with HIV during ICU admission. *J Pharm Pract* 2022;35:952-62. [PUBMED](#) | [CROSSREF](#)
37. Hocqueloux L, Lefevre S, Bois J, Brucato S, Alix A, Valentin C, Peyro-Saint-Paul L, Got L, Fournel F, Dargere S, Prazuck T, Fournier A, Gregoire N, McNicholl I, Parienti JJ. Bioavailability of dissolved and crushed single tablets of bicitgravir, emtricitabine, tenofovir alafenamide in healthy adults: the SOLUBIC randomized crossover study. *J Antimicrob Chemother* 2022;78:161-8. [PUBMED](#) | [CROSSREF](#)
38. Roskam-Kwint M, Bollen P, Colbers A, Duisenberg-van Essenberg M, Harbers V, Burger D. Crushing of dolutegravir fixed-dose combination tablets increases dolutegravir exposure. *J Antimicrob Chemother* 2018;73:2430-4. [PUBMED](#) | [CROSSREF](#)
39. Scholten S, Mauruschat S, Hindermann S, Ranneberg B. Administration of darunavir tablets in patients with difficulties in swallowing - two case reports. *J Int AIDS Soc* 2010;13 (Suppl 4):P114. [CROSSREF](#)
40. Taegtmeyer AB, Müller V, Kovari H, Kullak-Ublick GA, Corti N. Effect of continuous venovenous hemodiafiltration on darunavir and raltegravir exposure after administration via a

- gastrointestinal tube. *AIDS* 2011;25:1339-41. [PUBMED](#) | [CROSSREF](#)
41. Kim CH, Muzevich KM, Fulco PP. Orogastric administration of crushed darunavir tablets for a critically ill patient. *Can J Hosp Pharm* 2014;67:39-42. [PUBMED](#) | [CROSSREF](#)
  42. Brown K, Thomas D, McKenney K, Reeder M, Simonson RB, Bicer C, Nettles RE, Crauwels H. Impact of splitting or crushing on the relative bioavailability of the darunavir/cobicistat/emtricitabine/tenofovir alafenamide single-tablet regimen. *Clin Pharmacol Drug Dev* 2019;8:541-8. [PUBMED](#) | [CROSSREF](#)
  43. Porter AM, Baker CR, Fulco PP. Administration of crushed doravirine via nasojejunal feeding tube in a patient with treatment-experienced human immunodeficiency virus. *J Pharm Pract* 2023;36:745-6. [PUBMED](#) | [CROSSREF](#)
  44. Cattaneo D, Baldelli S, Cerea M, Landonio S, Meraviglia P, Simioni E, Cozzi V, Fucile S, Gazzaniga A, Clementi E, Galli M, Rizzardini G, Gervasoni C. Comparison of the *in vivo* pharmacokinetics and *in vitro* dissolution of raltegravir in HIV patients receiving the drug by swallowing or by chewing. *Antimicrob Agents Chemother* 2012;56:6132-6. [PUBMED](#) | [CROSSREF](#)
  45. Best BM, Capparelli EV, Diep H, Rossi SS, Farrell MJ, Williams E, Lee G, van den Anker JN, Rakhmanina N. Pharmacokinetics of lopinavir/ritonavir crushed versus whole tablets in children. *J Acquir Immune Defic Syndr* 2011;58:385-91. [PUBMED](#) | [CROSSREF](#)
  46. Kakuda TN, Berckmans C, De Smedt G, Leemans R, Leopold L, Peeters M, Nijs S, Vyncke V, van Solingen-Ristea R, Hoetelmans RM. Single-dose pharmacokinetics of pediatric and adult formulations of etravirine and swallowability of the 200-mg tablet: results from three Phase 1 studies. *Int J Clin Pharmacol Ther* 2013;51:725-37. [PUBMED](#) | [CROSSREF](#)
  47. Lucas GM, Ross MJ, Stock PG, Shlipak MG, Wyatt CM, Gupta SK, Atta MG, Wools-Kaloustian KK, Pham PA, Bruggeman LA, Lennox JL, Ray PE, Kalayjian RC; HIV Medicine Association of the Infectious Diseases Society of America. Clinical practice guideline for the management of chronic kidney disease in patients infected with HIV: 2014 update by the HIV Medicine Association of the Infectious Diseases Society of America. *Clin Infect Dis* 2014;59:e96-138. [PUBMED](#) | [CROSSREF](#)
  48. Kim JH, Jang H, Kim JH, Song JY, Kim SW, Kim SI, Choi BY, Choi JY. The incidence and risk factors of renal insufficiency among Korean HIV infected patients: the Korea HIV/AIDS cohort study. *Infect Chemother* 2022;54:534-41. [PUBMED](#) | [CROSSREF](#)
  49. Srisopa S, Kornjirakasemsan A, Treebupachatsakul P, Sonthisombat P. Incidence and risk factors of tenofovir disoproxil fumarate induced nephrotoxicity and renal function recovery, a hospital case-control study. *Infect Chemother* 2023;55:226-36. [PUBMED](#) | [CROSSREF](#)
  50. Böhler J, Donauer J, Keller F. Pharmacokinetic principles during continuous renal replacement therapy: drugs and dosage. *Kidney Int Suppl* 1999;(72):S24-8. [PUBMED](#) | [CROSSREF](#)
  51. Kim J, Nam HJ, Jung YJ, Lee HJ, Kim SE, Kang SJ, Park KH, Chang HH, Kim SW, Chung EK, Kim UJ, Jung SI. Weight gain and lipid profile changes in Koreans with human immunodeficiency virus undergoing integrase strand transfer inhibitor-based regimens. *Infect Chemother* 2022;54:419-32. [PUBMED](#) | [CROSSREF](#)
  52. Chang HH. Weight gain and metabolic syndrome in human immunodeficiency virus patients. *Infect Chemother* 2022;54:220-35. [PUBMED](#) | [CROSSREF](#)
  53. Steenackers N, Vanuytsel T, Augustijns P, Tack J, Mertens A, Lannoo M, Van der Schueren B, Matthys C. Adaptations in gastrointestinal physiology after sleeve gastrectomy and Roux-en-Y gastric bypass. *Lancet Gastroenterol Hepatol* 2021;6:225-37. [PUBMED](#) | [CROSSREF](#)
  54. Tomilo DL, Smith PF, Ogundele AB, Difrancesco R, Berenson CS, Eberhardt E, Bednarczyk E, Morse GD. Inhibition of atazanavir oral absorption by lansoprazole gastric acid suppression in healthy volunteers. *Pharmacotherapy* 2006;26:341-6. [PUBMED](#) | [CROSSREF](#)
  55. James C, Preininger L, Sweet M. Rilpivirine: a second-generation nonnucleoside reverse transcriptase inhibitor. *Am J Health Syst Pharm* 2012;69:857-61. [PUBMED](#) | [CROSSREF](#)
  56. Song I, Borland J, Arya N, Wynne B, Piscitelli S. Pharmacokinetics of dolutegravir when administered with mineral supplements in healthy adult subjects. *J Clin Pharmacol* 2015;55:490-6. [PUBMED](#) | [CROSSREF](#)
  57. Tempestilli M, D'Avolio A, De Nicolò A, Agrati C, Antinori A, Cicalini S. Pharmacokinetics of bicitgravir, emtricitabine and tenofovir alafenamide in a gastrectomized patient with HIV. *J Antimicrob Chemother* 2021;76:3320-2. [PUBMED](#) | [CROSSREF](#)
  58. Piso RJ, Battegay M, Marzolini C. Dolutegravir plasma levels after gastric bypass surgery. *AIDS* 2017;31:1052-4. [PUBMED](#) | [CROSSREF](#)
  59. MacBrayne CE, Blum JD, Kiser JJ. Tenofovir, emtricitabine, and darunavir/ritonavir pharmacokinetics in an HIV-infected patient after Roux-en-Y gastric bypass surgery. *Ann Pharmacother* 2014;48:816-9. [PUBMED](#) | [CROSSREF](#)
  60. Baettig V, Courlet P, Delko T, Battegay M, Marzolini C. Boosted darunavir, emtricitabine and tenofovir pharmacokinetics in the early and late postgastric bypass surgery periods. *AIDS* 2018;32:1903-5. [PUBMED](#) | [CROSSREF](#)
  61. Muzard L, Alvarez JC, Gbedo C, Czernichow S, Carette C. Tenofovir pharmacokinetic after sleeve-gastrectomy in four severely obese patients living with HIV. *Obes Res Clin Pract* 2017;11:108-13. [PUBMED](#) | [CROSSREF](#)
  62. Amouyal C, Buyse M, Lucas-Martini L, Hirt D, Genser L, Torcivia A, Bouillot JL, Oppert JM, Aron-Wisniewsky J. Sleeve gastrectomy in morbidly obese HIV patients: focus on anti-retroviral treatment absorption after surgery. *Obes Surg* 2018;28:2886-93. [PUBMED](#) | [CROSSREF](#)
  63. Roelofsen EE, Wildenbeest S, Mollema FP, Burger DM. Pharmacokinetics of tenofovir disoproxil fumarate/emtricitabine in a client on pre-exposure prophylaxis after a total gastrectomy. *AIDS* 2020;34:1989-91. [PUBMED](#) | [CROSSREF](#)
  64. Hong WB, Tan WK, Law LS, Ong DE, Lo EA. Changes of drug pharmacokinetics in patients with short bowel syndrome: a systematic review. *Eur J Drug Metab Pharmacokinet* 2021;46:465-78. [PUBMED](#) | [CROSSREF](#)
  65. Severijnen R, Bayat N, Bakker H, Tolboom J, Bongaerts G. Enteral drug absorption in patients with short small bowel : a review. *Clin Pharmacokinet* 2004;43:951-62. [PUBMED](#) | [CROSSREF](#)
  66. Ikuma M, Watanabe D, Yagura H, Ashida M, Takahashi M, Shibata M, Asaoka T, Yoshino M, Uehira T, Sugiura W, Shirasaka T. Therapeutic drug monitoring of anti-human immunodeficiency virus drugs in a patient with short bowel syndrome. *Intern Med* 2016;55:3059-63. [PUBMED](#) | [CROSSREF](#)
  67. University of Liverpool. Effect of Gastrointestinal surgery on ARB absorption. Available at: [www.hiv-druginteractions.org/prescribing\\_resources/hiv-guidance-gastric-surgery](http://www.hiv-druginteractions.org/prescribing_resources/hiv-guidance-gastric-surgery). Accessed 16 July 2024.
